# Supplementary material
Source: HighWire-hosted journal article supplement (https://jnm.snmjournals.org/highwire/filestream/94126/field_highwire_adjunct_files/0/jnm078709_Supp_Table_1.pdf)
Supplement: jnm078709_Supp_Table_1.pdf [file jnm078709_Supp_Table_1.pdf]

**Supplemental Table 1 Complete study cohort.**

| Pat. # | Clinical Responder | Age | NYHA before CRT | NYHA after CRT | LVEF before CRT | LVEF after CRT | LVESV before CRT | LVESV after CRT | Persisting dys-synchrony in Echo | LV lead in non-viable myocardium | Total LV Scar burden | Phase SD | Phase Global Entropy | Band with | Impact on therapy desicion | Revasculari-zation prior to or after CRT |
|--------|--------------------|-----|-----------------|----------------|-----------------|----------------|------------------|-----------------|----------------------------------|----------------------------------|----------------------|----------|----------------------|-----------|----------------------------|------------------------------------------|
| 1      | 0                  | 56  | 3               | 3              | 32              | 25             | 261              | 295             | 1                                | 0                                | 30                   | 23       | 83                   | 35        | 1                          | prior                                    |
| 2      | 0                  | 75  | 3               | 3              | 32              | 35             | 189              | 166             | 1                                | 0                                | 17                   | 43       | 82                   | 137       | 0                          | prior / after                            |
| 3      | 0                  | 77  | 3               | 3              | 20              | 24             | 112              | 97              | 1                                | 0                                | 50                   | 31       | 83                   | 83        | 1                          | prior                                    |
| 4      | 1                  | 77  | 3               | 2              | 24              | 35             | 208              | 155             | 0                                | 0                                | 24                   | 54       | 77                   | 65        | 0                          | no                                       |
| 5      | 1                  | 70  | 3               | 2              | 13              | 20             | 218              | 173             | 1                                | 0                                | 16                   | 32       | 74                   | 63        | 0                          | prior                                    |
| 6      | 1                  | 69  | 3               | 2              | 12              | 23             | 368              | 221             | 1                                | 0                                | 5                    | 50       | 83                   | 59        | 0                          | no                                       |
| 7      | 1                  | 52  | 3               | 2              | 22              | 61             | 185              | 75              | 0                                | 0                                | 3                    | 37       | 83                   | 113       | 0                          | no                                       |
| 8      | 1                  | 77  | 3               | 2              | 34              | 48             | 179              | 90              | 0                                | 0                                | 5                    | 40       | 74                   | 126       | 0                          | prior                                    |
| 9      | 1                  | 62  | 3               | 2              | 28              | 43             | 234              | 163             | 0                                | 0                                | 3                    | 42       | 78                   | 119       | 0                          | no                                       |
| 10     | 1                  | 67  | 3               | 2              | 32              | 41             | 228              | 171             | 0                                | 0                                | 13                   | 36       | 73                   | 90        | 0                          | prior                                    |
| 11     | 0                  | 71  | 3               | 3              | 31              | 29             | 209              | 191             | 0                                | 1                                | 13                   | 45       | 88                   | 84        | 0                          | prior / after                            |
| 12     | 0                  | 75  | 3               | 4              | 12              | 10             | 267              | 283             | 0                                | 1                                | 29                   | 17       | 79                   | 99        | 1                          | prior                                    |
| 13     | 0                  | 57  | 3               | 3              | 35              | 23             | 204              | 227             | 1                                | 1                                | 65                   | 27       | 78                   | 29        | 1                          | no                                       |
| 14     | 0                  | 65  | 3               | 3              | 25              | 34             | 198              | 173             | 1                                | 1                                | 5                    | 55       | 85                   | 158       | 0                          | no                                       |
